# Supplementary material for: Active Site Detection by Spatial Conformity and Electrostatic Analysis—Unravelling a Proteolytic Function in Shrimp Alkaline Phosphatase
Source: PLOS journal article supplement (doi:10.1371/journal.pone.0028470), 2011-12-08
Supplement: S2 (10.1371/journal.pone.0028470.s002) [file journal.pone.0028470.s002]

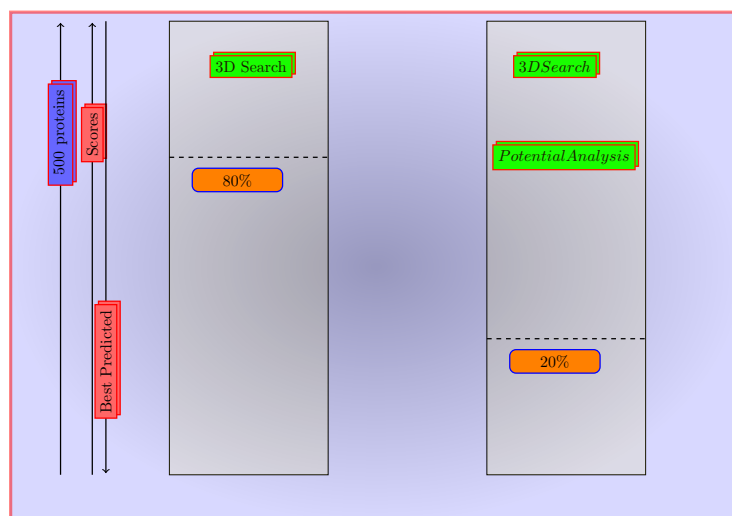

Supplementary Fig. 2:  $\sim 500$  non-redundant proteins that have the best 3D matches with the Class A  $\beta$ -lactamase motif. We demonstrate that electrostatic conformity leads to a considerable reduction in false positives. The dashed line denotes the highest scoring  $\beta$ -lactamase (PDB id: 2QZ6). When 3D conformity is the sole criteria, there are 80% of the proteins that are below this score, and qualify as possible  $\beta$ -lactamases. This number reduces to 20% when electrostatic conformity is combined with 3D congruence. This analysis was performed on a set of  $\sim 500$  proteins that were the best candidates using a quick 3D match on all the  $\sim 50,000$  proteins in the PDB database. It is to be noted that the 4 fold enrichment achieved on this set is an underestimation of the power of our method since the chosen set of proteins was a filtered category through 3D congruence.
